# Supplementary material for: Molecular mechanisms for environmentally induced and evolutionarily rapid redistribution (plasticity) of meiotic recombination
Source: PubMed Central journal article supplement (PMC9097252; doi:10.1093/genetics/iyab212), 2021-12-09
Supplement: iyab212_Supplementary_Data.pdf [file iyab212_Supplementary_Data.pdf]

Supplementary Material

## Molecular mechanisms for environmentally induced and evolutionarily rapid redistribution (plasticity) of meiotic recombination

Reine U. Protacio<sup>1</sup>, Tresor O. Mukiza<sup>1,2</sup>, Mari K. Davidson<sup>1</sup>, and Wayne P. Wahls<sup>1\*</sup>

<sup>1</sup> Department of Biochemistry and Molecular Biology, University of Arkansas for Medical Sciences, 4301 West Markham Street (slot 516), Little Rock, AR 72205-7199, USA

<sup>2</sup> Present address: Department of Cell and Molecular Biology, St. Jude Children's Research Hospital, 262 Danny Thomas Place, Memphis, TN 38105-3678

\*To whom correspondence should be addressed. Voice: +1 (501) 686-5787; Fax: +1 (501) 526-7008; Email: [wahlswaynep@uams.edu](mailto:wahlswaynep@uams.edu)

This file contains:

Table S1. Genotypes of fission yeast strains

Table S2. DNA sequences of PCR primers

**Table S1. Genotypes of fission yeast strains**

| Strain   | Genotype <sup>a</sup>                                                |
|----------|----------------------------------------------------------------------|
| WSP 0004 | <i>h+ ade6-M210</i>                                                  |
| WSP 0006 | <i>h+ ade6-M375</i>                                                  |
| WSP 0016 | <i>h- ade6-M210</i>                                                  |
| WSP 0018 | <i>h- ade6-M26</i>                                                   |
| WSP 0022 | <i>h- ade6-M375 leu1-32</i>                                          |
| WSP 2650 | <i>h+ ade6-M26 atf1D15::ura4F his3-D1 leu1-32 ura4-D18</i>           |
| WSP 2651 | <i>h- ade6-M210 atf1D15::ura4F his3-D1 leu1-32 ura4-D18</i>          |
| WSP 2655 | <i>h+ ade6-M26 pcr1D1::his3F his3-D1 leu1-32 ura4-D18</i>            |
| WSP 2657 | <i>h- ade6-M210 pcr1D1::his3F his3-D1 leu1-32 ura4-D18</i>           |
| WSP 2659 | <i>h+ ade6-M375 pcr1D1::his3F his3-D1 leu1-32 ura4-D18</i>           |
| WSP 5814 | <i>h- ade6-M26</i>                                                   |
| WSP 5815 | <i>h+ ade6-M26</i>                                                   |
| WSP 5818 | <i>h- ade6-M375</i>                                                  |
| WSP 6270 | <i>h+ ade6-M210</i>                                                  |
| WSP 6540 | <i>h+ ade6-4002 ura4-D18</i>                                         |
| WSP 6573 | <i>h+ ade6-4099 ura4-D18</i>                                         |
| WSP 6577 | <i>h- ade6-4099 ura4-D18</i>                                         |
| WSP 6799 | <i>h+ ade6-M26 rst2D::ura4F ura4-D18</i>                             |
| WSP 6806 | <i>h- ade6-M210 rst2D::ura4F ura4-D18</i>                            |
| WSP 6807 | <i>h+ ade6-M210 ura4-D18 leu1-32 rst2D::ura4+</i>                    |
| WSP 6811 | <i>h+ ade6-4002 rst2D::ura4F ura4-D18</i>                            |
| WSP 6815 | <i>h+ ade6-4099 rst2D::ura4F ura4-D18</i>                            |
| WSP 6890 | <i>h+ ade6-M26 php2D::kanMX6</i>                                     |
| WSP 7485 | <i>h+ ade6-4002 atf1D15::ura4F his3-D1 ura4-D18</i>                  |
| WSP 7487 | <i>h+ ade6-4099 atf1D15::ura4F his3-D1 ura4-D18</i>                  |
| WSP 7508 | <i>h- ade6-4099 php2D::kanMX6</i>                                    |
| WSP 7510 | <i>h+ ade6-4002 php2D::kanMX6</i>                                    |
| WSP 7519 | <i>h- ade6-m210 php2D::kanMX6</i>                                    |
| WSP 7520 | <i>h+ ade6-m210 php2D::kanMX6</i>                                    |
| WSP 7531 | <i>h+ ade6-M210 php3D::kanMX6 ura4-D18</i>                           |
| WSP 7537 | <i>h- ade6-4099 php3D::kanMX6</i>                                    |
| WSP 7541 | <i>h- ade6-M26 php3D::kanMX6</i>                                     |
| WSP 7543 | <i>h- ade6-4002 php3D::kanMX6</i>                                    |
| WSP 7553 | <i>h+ ade6-4002 pcr1D1::ura4F ura4-D18</i>                           |
| WSP 7558 | <i>h+ ade6-4099 pcr1D1::ura4F ura4-D18</i>                           |
| WSP 7692 | <i>h- ade6-4099 ura4-D18 leu1-32 rst2D::ura4+</i>                    |
| WSP 7704 | <i>h+ ade6-4002 php5::kanMX6 ura4-D18</i>                            |
| WSP 7713 | <i>h- ade6-M210 php5::kanMX6</i>                                     |
| WSP 7715 | <i>h+ ade6-M375 php5::kanMX6 ura4-D18</i>                            |
| WSP 7720 | <i>h+ ade6-M26 php5::kanMX6</i>                                      |
| WSP 7722 | <i>h+ ade6-4099 php5::kanMX6 ura4-D18</i>                            |
| WSP 7816 | <i>h- ade6-4002</i>                                                  |
| WSP 8011 | <i>h+ ade6-M210 ura4-D18 leu1-32 rst2D::ura4+ (pREP3X-Rst2-LEU2)</i> |
| WSP 8013 | <i>h- ade6-4099 ura4-D18 leu1-32 rst2D::ura4+ (pREP3X-Rst2-LEU2)</i> |
| WSP 8026 | <i>h- ade6-M210 ura4-D18 leu1-32 pcr1D::ura4F</i>                    |

WSP 8033 *h+ ade6-4099 ura4-D18 leu1-32 pcr1D::ura4F*  
WSP 8040 *h+ ade6-4099 ura4-D18 leu1-32 pcr1D::ura4F (pREP3X-Rst2-LEU2)*  
WSP 8045 *h- ade6-M210 ura4-D18 leu1-32 pcr1D::ura4F (pREP3X-Rst2-LEU2)*  
WSP 8078 *h- ade6-4099 pat1-114 pcr1-HA::kanMX6*  
WSP 8082 *h- ade6-4002 pat1-114 pcr1-HA::kanMX6*  
WSP 8086 *h- ade6-4099*

---

<sup>a</sup> Fission yeast nomenclature uses a “D” to designate deletion. These are referred to as “Δ” in the text and figures for the sake of clarity. The *ade6-M26* allele contains the *M26* DNA sequence motif; *ade6-4002* contains the *CCAAT* DNA sequence motif; *ade6-4099* contains the *Oligo-C* DNA sequence motif. See **Table 1** for DNA sequences and locations of all *ade6* alleles.

**Table S2. DNA sequences of PCR primers**

| Amplicon | Primer <sup>a</sup> | Sequence                        | Purpose <sup>b</sup> |
|----------|---------------------|---------------------------------|----------------------|
| Cam1     | <i>cam1+258F</i>    | 5'-GCCTACTGCCGCCGAATTAC-3'      | RT-PCR               |
|          | <i>cam1+376R</i>    | 5'-GGCTTCGCGAACTTCCTCTTC-3'     | RT-PCR               |
| Php5     | <i>php5+593F</i>    | 5'-GTCAAGCTCATATGTCTGCTACT-3'   | RT-PCR               |
|          | <i>php5+678R</i>    | 5'-GGCATTGGAAACCCTTGATTG-3'     | RT-PCR               |
| Php3     | <i>php3+200F</i>    | 5'-CATCTGAACAATGCACTCAAGAA-3'   | RT-PCR               |
|          | <i>php3+253R</i>    | 5'-CTCTCTGTATTTGGTGAGAGAAATC-3' | RT-PCR               |
| Php2     | <i>php2+891F</i>    | 5'-TGTACTIONACCAGCGAGCGATA-3'   | RT-PCR               |
|          | <i>php2+926R</i>    | 5'-CAATCTCGTACCCTTCAGGAATAG-3'  | RT-PCR               |
| Pcr1     | <i>pcr1+126F</i>    | 5'-CAATGCTGCCTTTGAGCAATC-3'     | RT-PCR               |
|          | <i>pcr1+207R</i>    | 5'-CAACCCTGATGGGCAAGTAAT-3'     | RT-PCR               |
| Atf1     | <i>atf1+1037F</i>   | 5'-GTACTIONCAGCAACAGCCTATGT-3'  | RT-PCR               |
|          | <i>atf1+1131R</i>   | 5'-CGTGGTTTTGGCGTAATGTTAAT-3'   | RT-PCR               |
| Rst2     | <i>rst2+844F</i>    | 5'-GACGATGAAAGTTTTGGCTAGAATG-3' | RT-PCR               |
|          | <i>rst2+926R</i>    | 5'-CAATCTCGTACCCTTCAGGAATAG-3'  | RT-PCR               |
| Hsp9     | <i>hsp9-299F</i>    | 5'-GCGCTCATTGGAAATAGCTTAC-3'    | ChIP                 |
|          | <i>hsp9-199R</i>    | 5'-GCTCGCTATCCAATCAGACAA-3'     | ChIP                 |
| Cdc18    | <i>cdc18+1310F</i>  | 5'-GGAAAGCTCAACATGACAACAC-3'    | ChIP                 |
|          | <i>cdc18+1412</i>   | 5'-GCACTIONAGCAGATTGGCTCATA-3'  | ChIP                 |
| Ade6     | <i>ade6+104F</i>    | 5'-CAGCAAATTCTCCTGCCAAAC-3'     | ChIP                 |
|          | <i>ade6+190R</i>    | 5'-GACAGTTCAACAATTGCATCGG-3'    | ChIP                 |

<sup>a</sup> The number after each primer name indicates position of the 5' end of the primer relative to the first nucleotide in the start codon of the gene (+1). F, forward primer; R, reverse primer.

<sup>b</sup> Purpose: RT-PCR, reverse-transcription PCR; ChIP, chromatin immunoprecipitation.
